# Supplementary material
Source: HighWire-hosted journal article supplement (https://jitc.bmj.com/content/9/11/e002970)

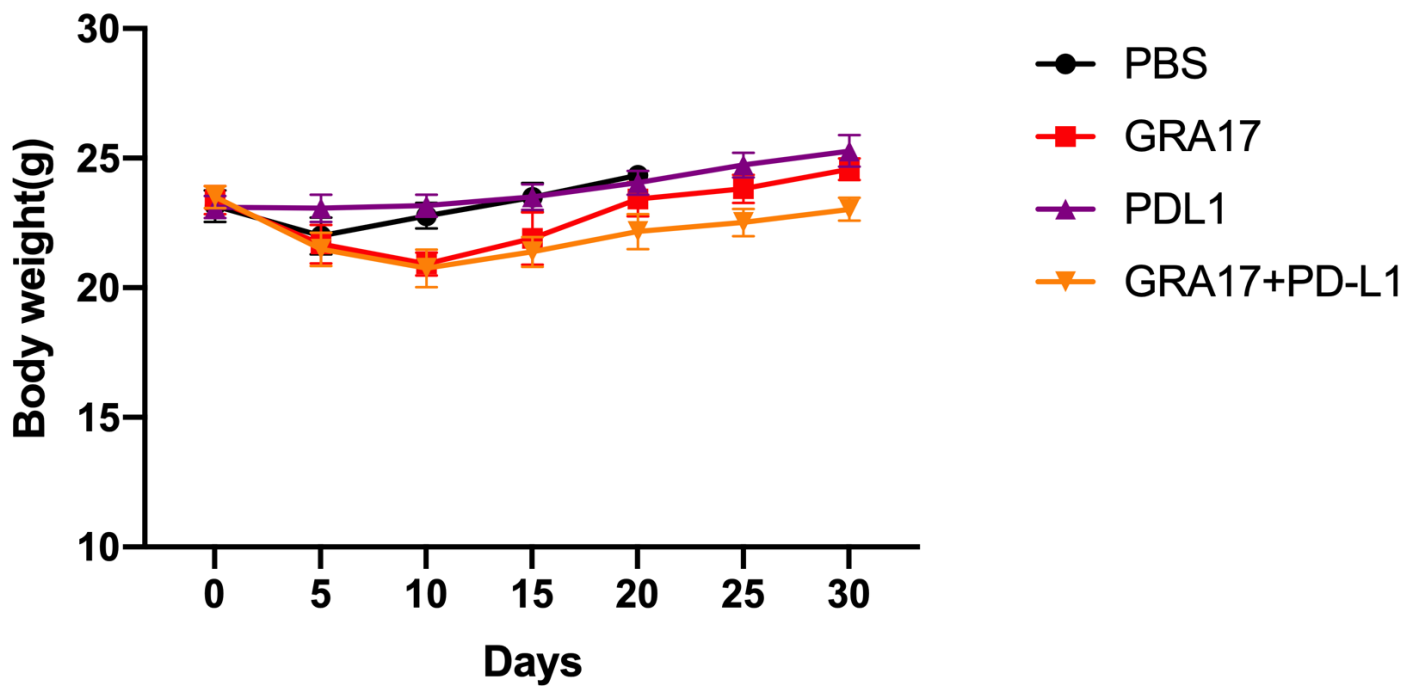

Supplement: inline-supplementary-material-12 [file inline-supplementary-material-12.pdf]

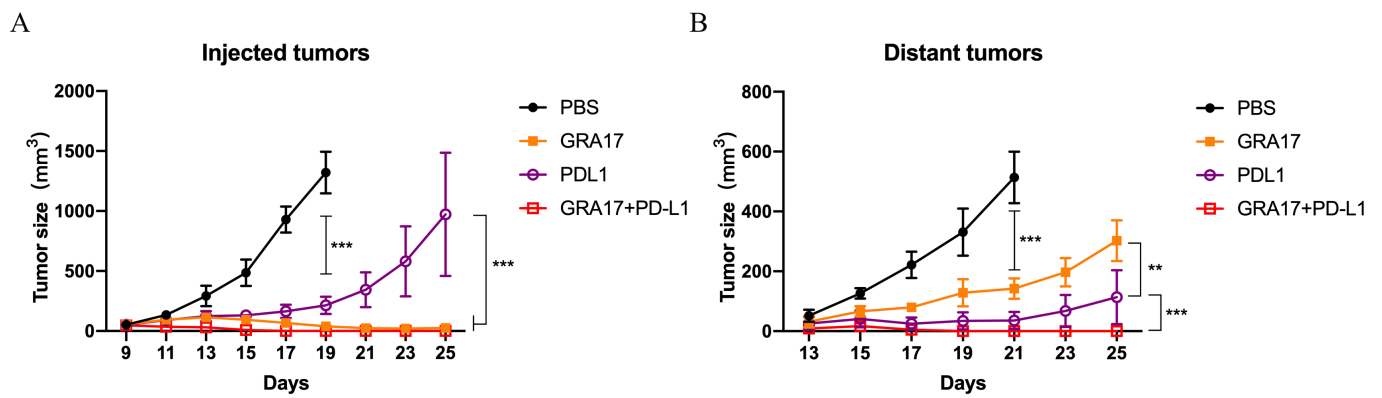

Supplement: inline-supplementary-material-13 [file inline-supplementary-material-13.pdf]

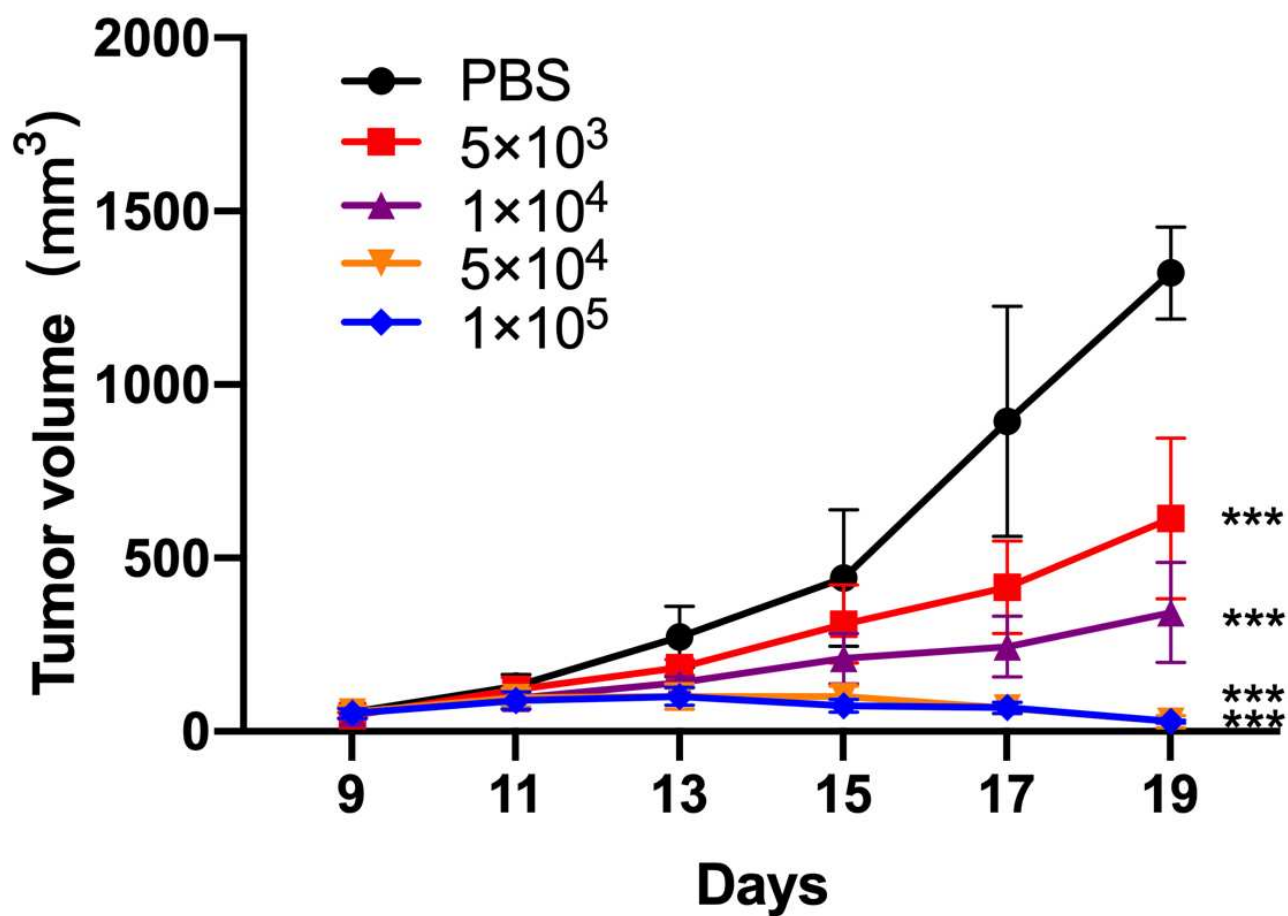

Supplement: inline-supplementary-material-2 [file inline-supplementary-material-2.pdf]
